# Supplementary material for: Infection Dynamics and Genomic Mutations of Hepatitis E Virus in Naturally Infected Pigs on a Farrow-to-Finish Farm in Japan: A Survey from 2012 to 2021
Source: MDPI journal article supplement (doi:10.3390/v15071516), 2023-07-07
Supplement: s1 [file s1]

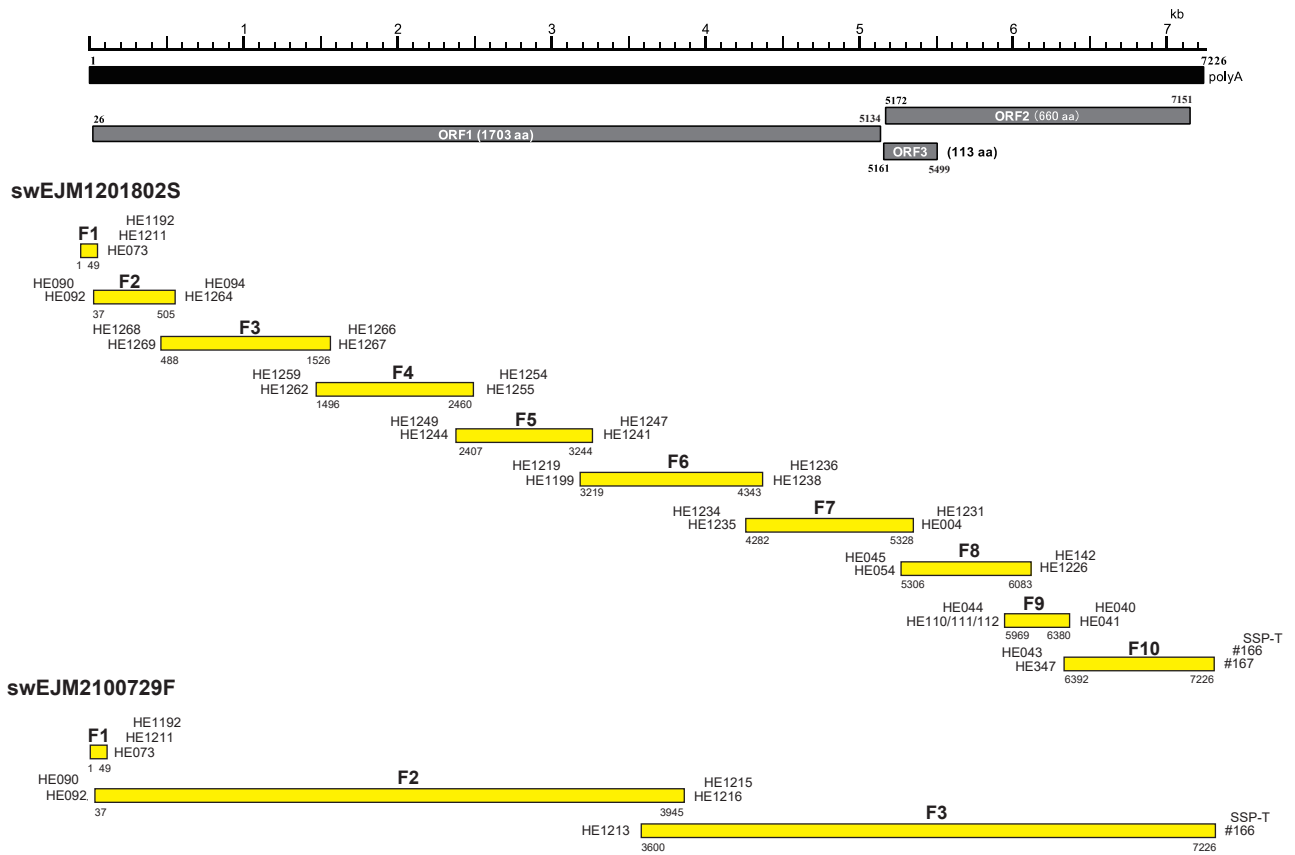

**Supplementary Fig. S1.** The genomic organization of HEV is illustrated at the top, and the regions amplified for nucleotide sequencing of the swEJM1201802S and swEJM2100729F genomes are depicted with shaded boxes at the bottom. The primers used for amplification of the swEJM1201802S and swEJM2100729F genomes are indicated in Supplementary Table S1 and Table S2, respectively.

**Supplementary Table S1**

Primers and the adaptor used for full-genome sequencing of swEJM1201802S

| Region             | Name           | Polarity | Sequence (5' to 3')                      | Position    | Note                             |
|--------------------|----------------|----------|------------------------------------------|-------------|----------------------------------|
| 1<br>(5' RLM-RACE) | 5'Adaptor      |          | UGGCGAUGAAUGAACACUGCGUUUGCUGGCUUUGAUGAAA | -           | RNA Adaptor for 5' RLM-RACE      |
|                    | HE1192         | -        | GCATTCGCCAAGGCRGAGTTG                    | 97 - 117    | cDNA synthesis                   |
|                    | 5'Outer Primer |          | TGGCGATGAATGAACACTGCG                    | -           | 1st-round PCR                    |
|                    | HE1211         | -        | GCAGCCAGAGCAGCCTGCTC                     | 74 - 93     | 1st-round PCR                    |
|                    | RLM-RACE2      |          | ATGAATGAACACTGCGTTTGCTGG                 | -           | 2nd-round PCR                    |
|                    | HE073          | -        | GGCAGTAGTAATGCCAGGAGC                    | 50 - 70     | 2nd-round PCR                    |
| 2                  | HE090          | +        | GCAGACCACRTATGTGGTCGAYGCC                | 1 - 25      | 1st-round PCR                    |
|                    | HE094          | -        | TGGCGGRMCATNGCCTCBGRACATC                | 542 - 567   | cDNA synthesis and 1st-round PCR |
|                    | HE092          | +        | TGTGGTCGAYGCCATGGAGGCCCA                 | 13 - 36     | 2nd-round PCR                    |
|                    | HE1264         | -        | TCATGCAGAGAGTAAAGGGCCAC                  | 506 - 528   | 2nd-round PCR                    |
| 3                  | HE1268         | +        | CCTGCCGACCGTACCTACTGT                    | 443 - 463   | 1st-round PCR                    |
|                    | HE1266         | -        | AAACATCAAGATATGCAGGCTCAGC                | 1553 - 1577 | cDNA synthesis and 1st-round PCR |
|                    | HE1269         | +        | TGATGGATTCTCCCGTGTGCT                    | 466 - 487   | 2nd-round PCR                    |
|                    | HE1267         | -        | GGATCAACCTCAGAACCCCTCATAGG               | 1527 - 1551 | 2nd-round PCR                    |
| 4                  | HE1259         | +        | AGAGTGCTYGTBTTYGATGAGTCAGT               | 1364 - 1389 | 1st-round PCR                    |
|                    | HE1254         | -        | CGCTGGTAAAAGGCATGACAGAGG                 | 2503 - 2526 | cDNA synthesis and 1st-round PCR |
|                    | HE1262         | +        | TTYTTRGARCCAGCTGAGGGC                    | 1475 - 1495 | 2nd-round PCR                    |
|                    | HE1255         | -        | CGGGTTGGAGGCATTAACCAGC                   | 2461 - 2482 | 2nd-round PCR                    |
| 5                  | HE1249         | +        | MCNCCCCCGTGCGTAAGCC                      | 2342 - 2361 | 1st-round PCR                    |
|                    | HE1247         | -        | CGTAACACACGGCTTGAGTTTGG                  | 3364 - 3387 | cDNA synthesis and 1st-round PCR |
|                    | HE1244         | +        | CCGCCGTCTYCTTTAYACCTA                    | 2386 - 2406 | 2nd-round PCR                    |
|                    | HE1241         | -        | GGGACCAAGCCAGCATGCTC                     | 3245 - 3264 | 2nd-round PCR                    |
| 6                  | HE1219         | +        | CGYCGTGTGTTKATTGAYGAGGC                  | 3125 - 3147 | 1st-round PCR                    |
|                    | HE1236         | -        | ACACCGACTCCTCATAAGCATCAC                 | 4362 - 4385 | cDNA synthesis and 1st-round PCR |
|                    | HE1199         | +        | CHTCRGTCCAYCTCCTYGGTGACC                 | 3195 - 3218 | 2nd-round PCR                    |
|                    | HE1238         | -        | AAGCATCACATAAAAGATGTTAGGCG               | 4344 - 4370 | 2nd-round PCR                    |
| 7                  | HE1234         | +        | TGYAAYAAGTTYACAACYGGWGAGACCAT            | 4208 - 4236 | 1st-round PCR                    |
|                    | HE1231         | -        | CCCGGATTGTGAAATGACATCG                   | 5363 - 5384 | cDNA synthesis and 1st-round PCR |
|                    | HE1235         | +        | CCAGGGYATATCRGCCTGGAGYAAGAC              | 4255 - 4281 | 2nd-round PCR                    |
|                    | HE004          | -        | GGGTTGGTTGGATGAATATAGGGGA                | 5329 - 5353 | 2nd-round PCR                    |
| 8                  | HE045          | +        | TGCCTATGYTGCCCGCGCCAC                    | 5212 - 5232 | 1st-round PCR                    |
|                    | HE142          | -        | TGGTATAYCGGGAHACACGG                     | 6125 - 6144 | cDNA synthesis and 1st-round PCR |
|                    | HE054          | +        | GGTGGTTTCTGGGGTGACAG                     | 5286 - 5305 | 2nd-round PCR                    |
|                    | HE1226         | -        | CGGGTGTCARATTCCTAAACTCAAGCTC             | 6084 - 6111 | 2nd-round PCR                    |
| 9                  | HE044          | +        | CAAGGHTGGCGYTCKGTTGAGAC                  | 5937 - 5959 | 1st-round PCR                    |
|                    | HE040          | -        | CCCTTRTCCTGCTGAGCRTTCTC                  | 6420 - 6442 | cDNA synthesis and 1st-round PCR |
|                    | HE110          | +        | GYTCKGTTGAGACCTCYGGGGT                   | 5947 - 5968 | 2nd-round PCR                    |
|                    | HE111          | +        | GYTCKGTTGAGACCACGGGYGT                   | 5947 - 5968 | 2nd-round PCR                    |
|                    | HE112          | +        | GYTCKGTTGAGACCTCTGGTGT                   | 5947 - 5968 | 2nd-round PCR                    |
|                    | HE041          | -        | TTMACWGTCTGCTGCCATTGGC                   | 6381 - 6403 | 2nd-round PCR                    |
| 10<br>(3' RACE)    | SSP-T          | -        | AAGGATCCGTCGACATCGATAATACGTTTTTTTTTTTTTT | -           | cDNA synthesis                   |
|                    | HE043          | +        | ACAGAATTGATTTCTGTCGGC                    | 6324 - 6343 | 1st-round PCR                    |
|                    | #166           | -        | AAGGATCCGTCGACATCGAT                     | -           | 1st-round PCR                    |
|                    | HE347          | +        | GTGTCTCRGCCAATGGCGA                      | 6372 - 6391 | 2nd-round PCR                    |
|                    | #167           | -        | CCGTCGACATCGATAATACG                     | -           | 2nd-round PCR                    |

**Supplementary Table S2**

Primers and the adaptor used for full-genome sequencing of swEJM2100729F

| Region             | Name           | Polarity | Sequence (5' to 3')                       | Position    | Note                             |
|--------------------|----------------|----------|-------------------------------------------|-------------|----------------------------------|
| 1<br>(5' RLM-RACE) | 5'Adaptor      |          | UGGCGAUGAAUGAACACUGCGUUUGCUGGCUUUGAUGAAA  | -           | RNA Adaptor for 5' RLM-RACE      |
|                    | HE1192         | -        | GCATTGCGCAAAGGCRGAGTTG                    | 97 - 117    | cDNA synthesis                   |
|                    | 5'Outer Primer |          | TGGCGATGAATGAACACTGCG                     | -           | 1st-round PCR                    |
|                    | HE1211         | -        | GCAGCCAGAGCAGCCTGCTC                      | 74 - 93     | 1st-round PCR                    |
|                    | RLM-RACE2      |          | ATGAATGAACACTGCGTTTGCTGG                  | -           | 2nd-round PCR                    |
|                    | HE073          | -        | GGCAGTAGTAATGCCAGGAGC                     | 50 - 70     | 2nd-round PCR                    |
| 2                  | HE090          | +        | GCAGACCACRTATGTGGTCGAYGCC                 | 1 - 25      | 1st-round PCR                    |
|                    | HE1215         | -        | CTCACAHGTRGTGGCCTGGAC                     | 4076 - 4096 | cDNA synthesis and 1st-round PCR |
|                    | HE092          | +        | TGTGGTCGAYGCCATGGAGGCCCA                  | 13 - 36     | 2nd-round PCR                    |
|                    | HE1216         | -        | CCYTGCTCRAGCTCRGGGCA                      | 3946 - 3965 | 2nd-round PCR                    |
| 3<br>(3' RACE)     | SSP-T          | -        | AAGGATCCGTCGACATCGATAATACGTTTTTTTTTTTTTTT | -           | cDNA synthesis                   |
|                    | HE1213         | +        | YACCCGYCAYACAGAGAAGTGC                    | 3577 - 3599 | 1st-round PCR                    |
|                    | #166           | -        | AAGGATCCGTCGACATCGAT                      | -           | 1st-round PCR                    |
